# Supplementary material
Source: publisher figshare collection journal article supplement (https://frontiersin.figshare.com/ndownloader/files/30457203)
Supplement: Supplementary file [file 30457203]

## Supplementary Material

### 1 Supplementary Figures and Tables

#### 1.1 Supplementary Figures

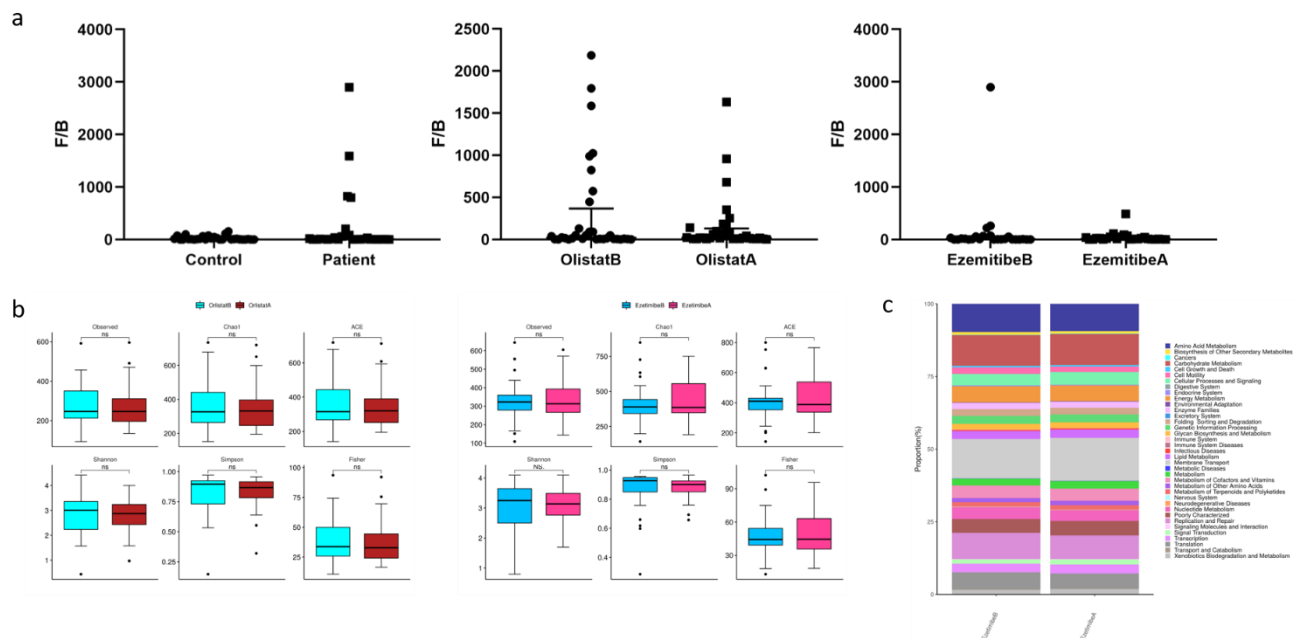

**Supplementary Figure 1. Gut microbiota diversity and F/B.** a) alpha diversity index before and after orlistat/ezetimibe intervention. b) *Firmicutes/Bacteroidetes* ratio. c) Proportions of KEGG pathways at level 2 encoded in the microbiome in two groups. No significant differences were found in these comparisons between groups. ns: not significant.

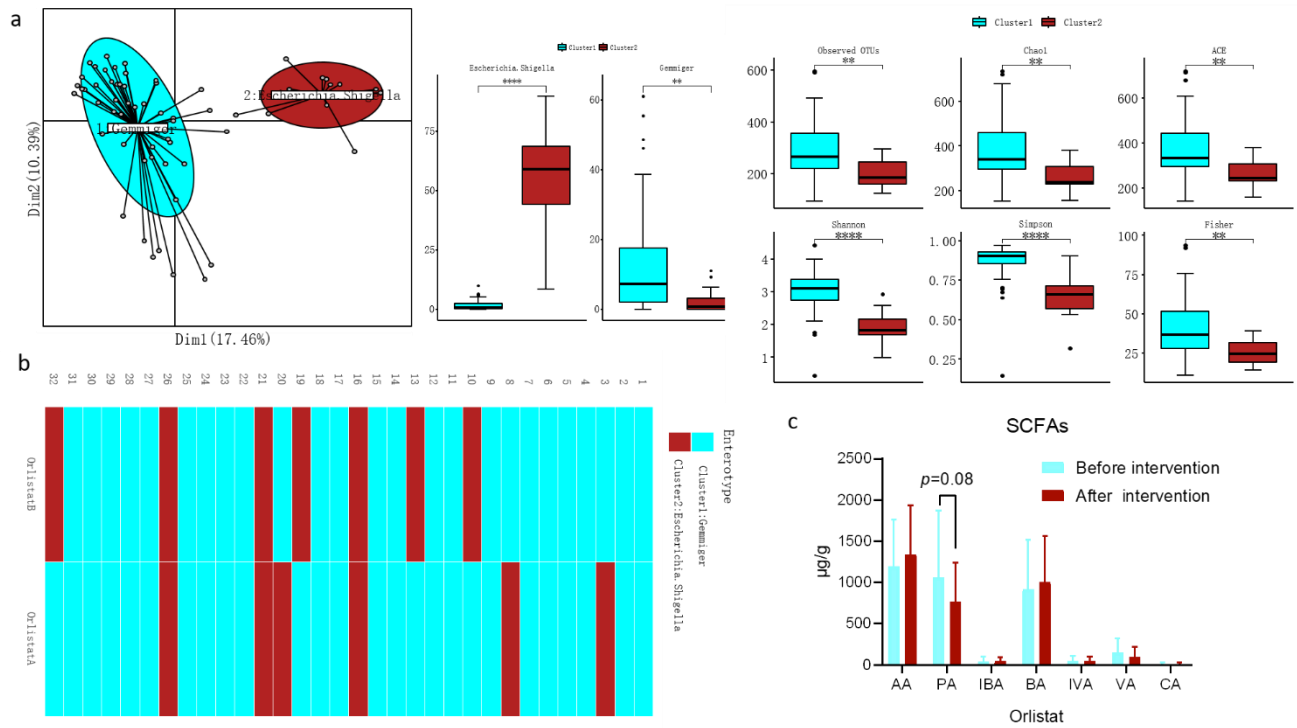

**Supplementary Figure 2. Differences of Enterotypes and SCFAs before and after orlistat intervention.** a) Determinations of enterotypes between groups. b) Heatmap of individual's enterotype. c) Fecal SCFAs level presented as mean  $\pm$  SD.

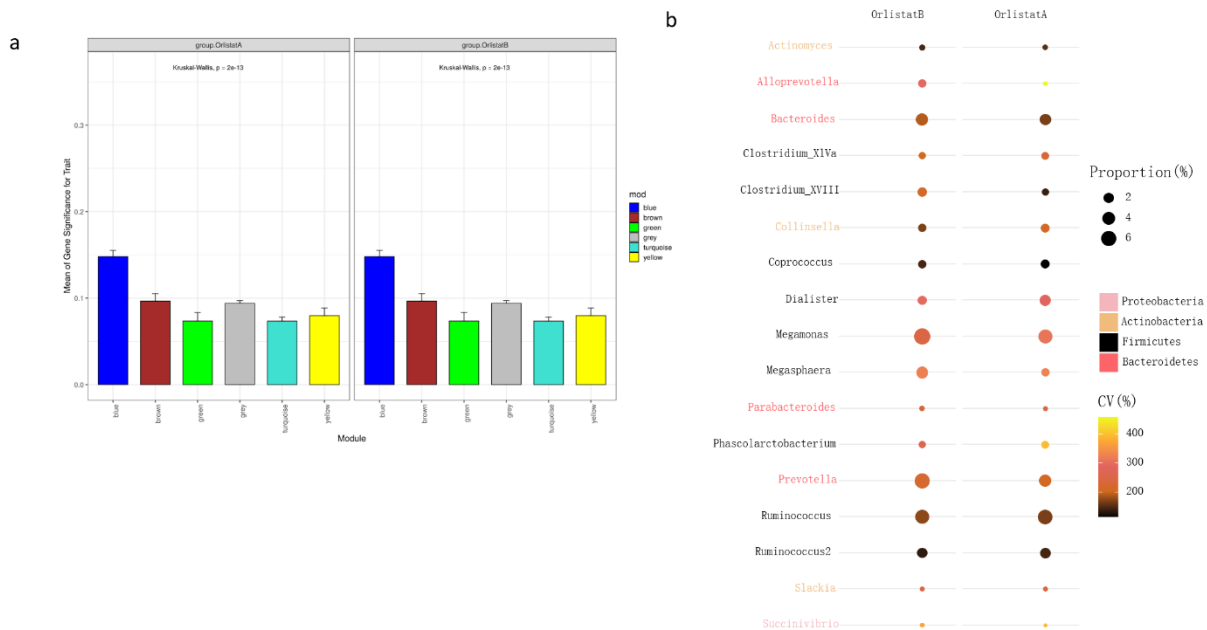

**Supplementary Figure 3. Core taxa responded to orlistat by WGCNA.** a) Modules which were significantly related to orlistat. b) Mean relative abundance of core taxa in blue module before and after intervention.

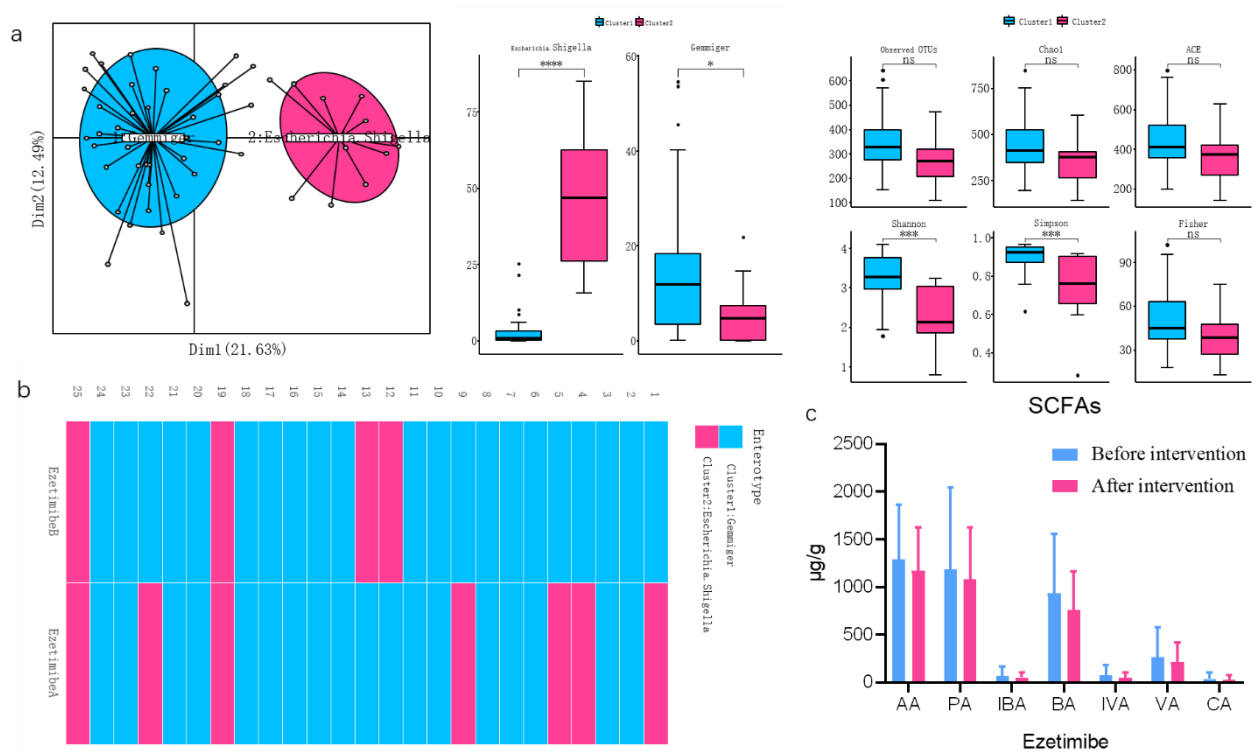

**Supplementary Figure 4. Differences of Enterotypes and SCFAs before and after ezetimibe intervention.** a) Determinations of enterotypes between groups. b) Heatmap of individual's enterotype. C) Fecal SCFAs level were presented as mean  $\pm$  SD.

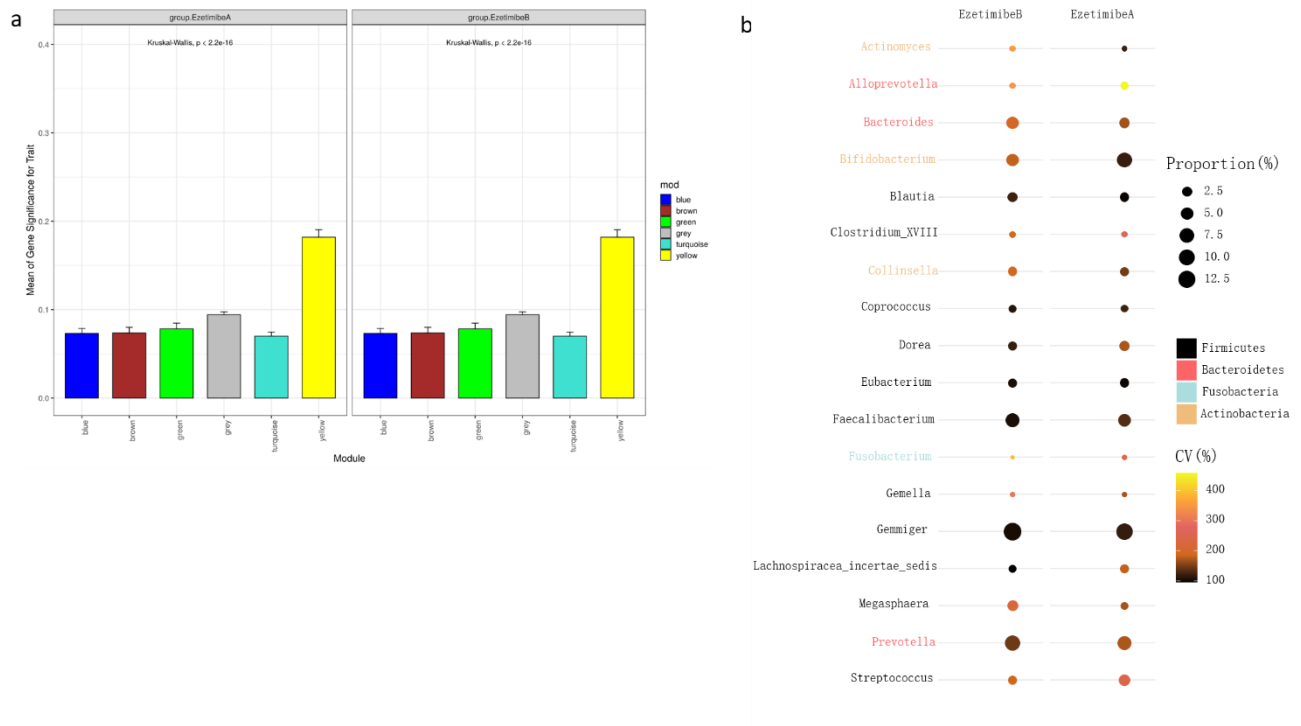

**Supplementary Figure 5. Core taxa responded to ezetimibe by WGCNA.** a) Modules which were significantly related to ezetimibe. b) Mean relative abundance of core taxa in yellow module before and after intervention.

1.2 Supplementary Tables

**Table S1 Mean relative abundance of core microbes responded to orlistat**

| Genus                        | mean.<br>OrlistatB. | variance.<br>OrlistatB. | stderr.<br>OrlistatB. | mean.<br>OrlistatA | variance.<br>OrlistatA | stderr.<br>OrlistatA | p-value     | q-value  | change |
|------------------------------|---------------------|-------------------------|-----------------------|--------------------|------------------------|----------------------|-------------|----------|--------|
| <i>Actinomyces</i>           | 0.240325762         | 1.20607E-05             | 0.000613918           | 0.180754423        | 7.35274E-06            | 0.000479346          | 0.790297874 | 1        | down   |
| <i>Alloprevotella</i>        | 0.956975051         | 0.000774411             | 0.004919385           | 0.081624493        | 1.39167E-05            | 0.000659468          | 7.21563E-07 | 9.71E-05 | down   |
| <i>Bacteroides</i>           | 3.347874589         | 0.003990421             | 0.011166944           | 2.752561823        | 0.002057618            | 0.008018764          | 0.705294705 | 1        | down   |
| <i>Clostridium_XIVa</i>      | 0.640695275         | 0.000166197             | 0.002278961           | 0.813617878        | 0.000328752            | 0.003205233          | 0.558608306 | 1        | up     |
| <i>Clostridium_XVIII</i>     | 1.717257995         | 0.001303505             | 0.006382361           | 0.693491377        | 8.89328E-05            | 0.001667078          | 0.133866134 | 1        | down   |
| <i>Collinsella</i>           | 1.027259084         | 0.000292369             | 0.003022671           | 1.316996106        | 0.000750828            | 0.004843901          | 0.633366633 | 1        | up     |
| <i>Coprococcus</i>           | 1.011989239         | 0.000205985             | 0.002537129           | 1.328121729        | 0.000227957            | 0.002669018          | 0.410589411 | 1        | up     |
| <i>Dialister</i>             | 1.400717999         | 0.001675593             | 0.007236178           | 2.537457014        | 0.005112468            | 0.012639803          | 0.456543457 | 1        | up     |
| <i>Megamonas</i>             | 7.418658632         | 0.033551229             | 0.032380177           | 5.036436819        | 0.023675471            | 0.027200339          | 0.579420579 | 1        | down   |
| <i>Megasphaera</i>           | 3.303173669         | 0.011243199             | 0.018744331           | 1.159465845        | 0.001399895            | 0.00661413           | 0.323676324 | 1        | down   |
| <i>Parabacteroides</i>       | 0.210408684         | 2.272E-05               | 0.000842615           | 0.12177018         | 8.61504E-06            | 0.000518864          | 0.548475261 | 1        | down   |
| <i>Phascolarctobacterium</i> | 0.607129873         | 0.000242568             | 0.002753228           | 0.841726384        | 0.001092563            | 0.005843167          | 0.300246211 | 1        | up     |
| <i>Prevotella</i>            | 6.103416406         | 0.018040311             | 0.023743625           | 3.481826397        | 0.004998668            | 0.012498334          | 0.323676324 | 1        | down   |
| <i>Ruminococcus</i>          | 4.864406958         | 0.007063878             | 0.01485753            | 5.501673284        | 0.008242883            | 0.016049614          | 0.797202797 | 1        | up     |
| <i>Ruminococcus2</i>         | 2.002285506         | 0.000697672             | 0.004669288           | 2.153480207        | 0.000927798            | 0.00538458           | 0.848151848 | 1        | up     |
| <i>Slackia</i>               | 0.118082723         | 7.85739E-06             | 0.000495523           | 0.084408315        | 3.65109E-06            | 0.000337782          | 1           | 1        | down   |
| <i>Succinivibrio</i>         | 0.089797372         | 1.09762E-05             | 0.000585667           | 0.049981999        | 3.85808E-06            | 0.000347225          | 1           | 1        | down   |

Metastat analysis was used to compare the differences of the relative abundance of species between groups, and  $p < 0.05$  was considered statistically significant.

Table S2 Mean relative abundance of core microbes responded to ezetimibe

| Genus                                | mean.<br>OrlistatB. | variance.<br>OrlistatB. | stderr.<br>OrlistatB. | mean.<br>OrlistatA | variance.<br>OrlistatA | stderr.<br>OrlistatA | p-value  | q-value | change |
|--------------------------------------|---------------------|-------------------------|-----------------------|--------------------|------------------------|----------------------|----------|---------|--------|
| <i>Actinomyces</i>                   | 0.399985254         | 0.00019747              | 0.002810481           | 0.245611873        | 8.33872E-06            | 0.000577537          | 0.453764 | 1       | down   |
| <i>Alloprevotella</i>                | 0.315046258         | 0.000116233             | 0.002156225           | 1.132985865        | 0.002661345            | 0.010317646          | 0.749251 | 1       | up     |
| <i>Bacteroides</i>                   | 5.113960135         | 0.009854705             | 0.019854173           | 3.295887367        | 0.002940735            | 0.010845709          | 0.461538 | 1       | down   |
| <i>Bifidobacterium</i>               | 4.9527519           | 0.007783812             | 0.017645183           | 8.21440652         | 0.00911012             | 0.01908939           | 0.242757 | 1       | up     |
| <i>Blautia</i>                       | 2.488799716         | 0.00088149              | 0.005937981           | 2.152549283        | 0.000425435            | 0.004125216          | 0.661339 | 1       | down   |
| <i>Clostridium_XVIII</i>             | 0.402710317         | 5.45029E-05             | 0.001476521           | 0.3727711          | 9.25865E-05            | 0.001924437          | 1        | 1       | down   |
| <i>Collinsella</i>                   | 2.015685547         | 0.001417033             | 0.0075287             | 1.771627421        | 0.000654658            | 0.005117256          | 0.789211 | 1       | down   |
| <i>Coprococcus</i>                   | 1.130068017         | 0.000146092             | 0.002417369           | 0.814224744        | 9.35041E-05            | 0.00193395           | 0.328671 | 1       | down   |
| <i>Dorea</i>                         | 1.608749454         | 0.000345609             | 0.003718113           | 2.792800196        | 0.002201144            | 0.009383269          | 0.27972  | 1       | up     |
| <i>Eubacterium</i>                   | 1.920586909         | 0.00038411              | 0.003919746           | 2.047126974        | 0.000389529            | 0.0039473            | 0.821179 | 1       | up     |
| <i>Faecalibacterium</i>              | 6.81544584          | 0.004827889             | 0.013896602           | 5.726696996        | 0.005559265            | 0.014912096          | 0.573427 | 1       | down   |
| <i>Fusobacterium</i>                 | 0.010405639         | 1.59765E-07             | 7.99412E-05           | 0.205095371        | 2.39868E-05            | 0.000979527          | 0.062375 | 1       | up     |
| <i>Gemella</i>                       | 0.069442586         | 4.25531E-06             | 0.000412568           | 0.085225258        | 2.02087E-06            | 0.000284314          | 1        | 1       | up     |
| <i>Gemmiger</i>                      | 13.37164956         | 0.01796322              | 0.026805388           | 11.62223634        | 0.017686009            | 0.026597751          | 0.633367 | 1       | down   |
| <i>Lachnospiracea_incertae_sedis</i> | 0.938258993         | 7.68574E-05             | 0.001753368           | 1.812262804        | 0.001034363            | 0.006432302          | 0.23976  | 1       | up     |
| <i>Megasphaera</i>                   | 3.297380245         | 0.005363717             | 0.01464748            | 1.008915721        | 0.000281546            | 0.003355868          | 0.142857 | 1       | down   |
| <i>Prevotella</i>                    | 9.544610636         | 0.018405155             | 0.02713312            | 7.720814146        | 0.016918383            | 0.026014137          | 0.639361 | 1       | down   |
| <i>Streptococcus</i>                 | 2.128972592         | 0.001515052             | 0.007784733           | 3.455576312        | 0.006787768            | 0.016477582          | 0.58042  | 1       | up     |

Metastat analysis was used to compare the differences of the relative abundance of species between groups, and  $p < 0.05$  was considered statistically significant.
